# Supplementary material for: Risky Alcohol Consumption and Heavy Episodic Drinking among Parents in Germany: Results of a Nationwide Cross-Sectional Study
Source: Hindawi journal article supplement (doi:10.1155/2019/3673479), 2019-12-05
Supplement: f1 [file 3673479.f1.pdf]

**Supplementary material 1: Characteristics of included and excluded cases according to selected sociodemographic variables, GEDA 2009/2010/2012, n=17,232**

|                                             | Included cases (n=16,224) |             | Excluded cases (n=1,008) |             | p-value |
|---------------------------------------------|---------------------------|-------------|--------------------------|-------------|---------|
|                                             | %                         | 95% CI      | %                        | 95% CI      |         |
| <b>Sex</b>                                  |                           |             |                          |             |         |
| Female                                      | 52.9                      | (52.0-53.9) | 39.0                     | (35.5-42.7) | <0.001  |
| Male                                        | 47.1                      | (46.1-48.0) | 61.0                     | (57.3-64.5) |         |
| <b>Age group</b>                            |                           |             |                          |             |         |
| 18-29                                       | 8.4                       | (7.9-9.0)   | 31.9                     | (28.5-35.4) | <0.001  |
| 30-39                                       | 36.6                      | (35.7-37.5) | 18.4                     | (15.6-21.5) |         |
| 40-49                                       | 44.3                      | (43.3-45.2) | 25.1                     | (22.0-28.5) |         |
| 50+                                         | 10.8                      | (10.2-11.4) | 24.6                     | (21.4-28.2) |         |
| <b>Education<sup>a</sup></b>                |                           |             |                          |             |         |
| Low                                         | 26.3                      | (25.3-27.2) | 32.7                     | (28.9-36.8) | 0.108   |
| Middle                                      | 52.9                      | (52.0-53.9) | 49.3                     | (45.4-53.2) |         |
| High                                        | 20.8                      | (20.2-21.4) | 18.0                     | (15.8-20.4) |         |
| <b>Income<sup>b</sup></b>                   |                           |             |                          |             |         |
| Low                                         | 14.6                      | (13.8-15.4) | 23.2                     | (19.9-26.8) | <0.001  |
| Middle                                      | 69.8                      | (68.9-70.7) | 56.7                     | (52.8-60.4) |         |
| High                                        | 15.6                      | (15.1-16.3) | 20.2                     | (17.4-23.2) |         |
| <b>Employment status</b>                    |                           |             |                          |             |         |
| Non-employed                                | 18.9                      | (18.1-19.7) | 32.6                     | (29.0-36.4) | <0.001  |
| Part-time                                   | 30.3                      | (29.5-31.2) | 19.7                     | (17.0-22.7) |         |
| Full-time                                   | 50.8                      | (49.8-51.7) | 47.7                     | (43.8-51.6) |         |
| <b>Experienced unemployment<sup>c</sup></b> |                           |             |                          |             |         |
| No                                          | 90.0                      | (89.4-90.6) | 90.7                     | (87.7-93.0) | 0.741   |
| Yes                                         | 10.0                      | (9.4-10.6)  | 9.3                      | (7.0-12.3)  |         |
| <b>Migration background</b>                 |                           |             |                          |             |         |
| No                                          | 79.7                      | (78.8-80.5) | 74.8                     | (71.0-78.4) | <0.001  |
| Yes                                         | 20.3                      | (19.5-21.2) | 25.2                     | (21.6-29.0) |         |
| <b>Living with partner</b>                  |                           |             |                          |             |         |
| No                                          | 8.8                       | (8.3-9.2)   | 38.1                     | (34.4-42.0) | 0.005   |
| Yes                                         | 91.2                      | (90.8-91.7) | 61.9                     | (58.0-65.6) |         |
| <b>Persons in household</b>                 |                           |             |                          |             |         |
| 1                                           | 0.0                       |             | 0.0                      |             | <0.001  |
| 2                                           | 3.9                       | (3.7-4.2)   | 22.5                     | (19.4-25.9) |         |
| 3                                           | 33.4                      | (32.6-34.3) | 26.0                     | (22.6-29.8) |         |
| 4                                           | 42.6                      | (41.7-43.6) | 29.4                     | (25.8-33.3) |         |
| 5+                                          | 20.0                      | (19.2-20.9) | 22.1                     | (19.0-25.6) |         |

<sup>a</sup> according to the CASMIN-classification; <sup>b</sup> net equivalent income compared to the median net equivalent income (low: under 60 %, middle: 60-150 %, high: > 150 %); <sup>c</sup> 12 months or more in the last 5 years

**Supplementary material 2: Prevalence of risky alcohol consumption and heavy episodic drinking among non-parents according to selected covariates, n=45,203**

|                                             | Risky alcohol consumption <sup>a</sup> |             |        |             | Heavy episodic drinking <sup>b</sup> |             |        |             |
|---------------------------------------------|----------------------------------------|-------------|--------|-------------|--------------------------------------|-------------|--------|-------------|
|                                             | Women                                  |             | Men    |             | Women                                |             | Men    |             |
|                                             | %                                      | 95% CI      | %      | 95% CI      | %                                    | 95% CI      | %      | 95% CI      |
| <b>Total</b>                                | 23.0                                   | (22.3-23.6) | 34.1   | (33.3-34.9) | 9.9                                  | (9.4-10.3)  | 24.1   | (23.4-24.8) |
| <b>Age group</b>                            |                                        |             |        |             |                                      |             |        |             |
| 18-29                                       | 36.3                                   | (34.7-38.0) | 45.7   | (44.0-47.4) | 21.9                                 | (20.6-23.3) | 40.9   | (39.3-42.6) |
| 30-39                                       | 25.5                                   | (23.0-28.1) | 34.5   | (31.9-37.1) | 12.7                                 | (10.9-14.8) | 29.5   | (27.1-32.0) |
| 40-49                                       | 22.5                                   | (20.7-24.5) | 32.2   | (30.0-34.5) | 10.0                                 | (8.7-11.5)  | 23.0   | (21.0-25.0) |
| 50+                                         | 19.5                                   | (18.7-20.3) | 30.0   | (29.0-31.1) | 6.6                                  | (6.2-7.2)   | 17.1   | (16.3-18.0) |
| p-value                                     | <0.001                                 |             | <0.001 |             | <0.001                               |             | <0.001 |             |
| <b>Education<sup>c</sup></b>                |                                        |             |        |             |                                      |             |        |             |
| Low                                         | 17.4                                   | (16.3-18.5) | 28.9   | (27.5-30.4) | 7.1                                  | (6.4-7.9)   | 18.9   | (17.7-20.2) |
| Middle                                      | 26.2                                   | (25.3-27.1) | 38.2   | (37.1-39.4) | 12.0                                 | (11.4-12.7) | 29.2   | (28.1-30.3) |
| High                                        | 30.2                                   | (28.8-31.6) | 34.7   | (33.4-36.0) | 11.1                                 | (10.1-12.1) | 22.3   | (21.2-23.5) |
| p-value                                     | <0.001                                 |             | <0.001 |             | <0.001                               |             | <0.001 |             |
| <b>Income<sup>d</sup></b>                   |                                        |             |        |             |                                      |             |        |             |
| Low                                         | 20.3                                   | (18.7-22.0) | 32.4   | (30.1-34.9) | 9.5                                  | (8.4-10.7)  | 24.8   | (22.7-27.1) |
| Middle                                      | 21.9                                   | (21.1-22.7) | 33.1   | (32.0-34.1) | 9.5                                  | (9.0-10.1)  | 22.8   | (21.9-23.8) |
| High                                        | 29.8                                   | (28.3-31.3) | 37.6   | (36.1-39.0) | 11.7                                 | (10.7-12.8) | 26.8   | (25.5-28.1) |
| p-value                                     | <0.001                                 |             | <0.001 |             | 0.001                                |             | <0.001 |             |
| <b>Employment status</b>                    |                                        |             |        |             |                                      |             |        |             |
| Non-employed                                | 19.9                                   | (19.0-20.8) | 30.3   | (29.1-31.6) | 7.5                                  | (7.0-8.2)   | 19.3   | (18.3-20.4) |
| Part-time                                   | 25.7                                   | (24.3-27.1) | 38.0   | (35.5-40.6) | 12.0                                 | (11.0-13.1) | 30.4   | (28.0-32.8) |
| Full-time                                   | 27.7                                   | (26.5-28.9) | 36.7   | (35.6-37.9) | 13.4                                 | (12.5-14.4) | 27.2   | (26.1-28.2) |
| p-value                                     | <0.001                                 |             | <0.001 |             | <0.001                               |             | <0.001 |             |
| <b>Experienced unemployment<sup>e</sup></b> |                                        |             |        |             |                                      |             |        |             |
| No                                          | 25.9                                   | (25.1-26.6) | 36.3   | (35.4-37.2) | 12.2                                 | (11.6-12.7) | 27.1   | (26.3-28.0) |
| Yes                                         | 20.9                                   | (18.7-23.4) | 32.4   | (29.5-35.5) | 7.9                                  | (6.5-9.6)   | 23.5   | (20.8-26.3) |
| p-value                                     | <0.001                                 |             | 0.017  |             | <0.001                               |             | 0.017  |             |
| <b>Migration background</b>                 |                                        |             |        |             |                                      |             |        |             |
| No                                          | 23.5                                   | (22.8-24.2) | 35.0   | (34.1-35.9) | 9.8                                  | (9.3-10.3)  | 24.3   | (23.5-25.1) |
| Yes                                         | 21.8                                   | (20.0-23.8) | 31.4   | (29.0-33.8) | 12.0                                 | (10.5-13.7) | 25.0   | (22.8-27.3) |
| p-value                                     | 0.114                                  |             | 0.006  |             | 0.004                                |             | 0.566  |             |
| <b>Living with partner</b>                  |                                        |             |        |             |                                      |             |        |             |
| No                                          | 23.3                                   | (22.4-24.2) | 38.3   | (37.1-39.6) | 11.3                                 | (10.7-12.0) | 31.3   | (30.1-32.4) |
| Yes                                         | 22.6                                   | (21.7-23.6) | 31.4   | (30.4-32.5) | 8.7                                  | (8.1-9.4)   | 19.6   | (18.7-20.5) |
| p-value                                     | 0.323                                  |             | <0.001 |             | <0.001                               |             | <0.001 |             |

<sup>a</sup> AUDIT-C score (women:  $\geq 4$ ; men:  $\geq 5$ ); <sup>b</sup>  $\geq 6$  alcoholic drinks on a single occasion at least once a month; <sup>c</sup> according to the CASMIN-classification; <sup>d</sup> net equivalent income compared to the median net equivalent income (low: under 60 %, middle: 60-150 %, high: > 150 %); <sup>e</sup> 12 months or more in the last 5 years
